# Supplementary figures and images for: Cerebellar modulation of synaptic input to freezing-related neurons in the periaqueductal gray
Source: eLife journal article supplement (doi:10.7554/elife.54302), 2020-03-24

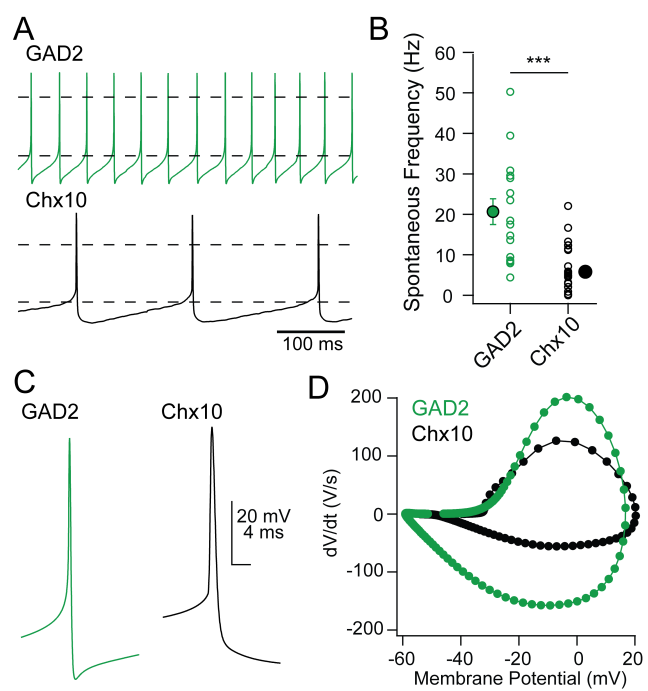

Supplement: supp [file elife-54302-supp-v1.zip]

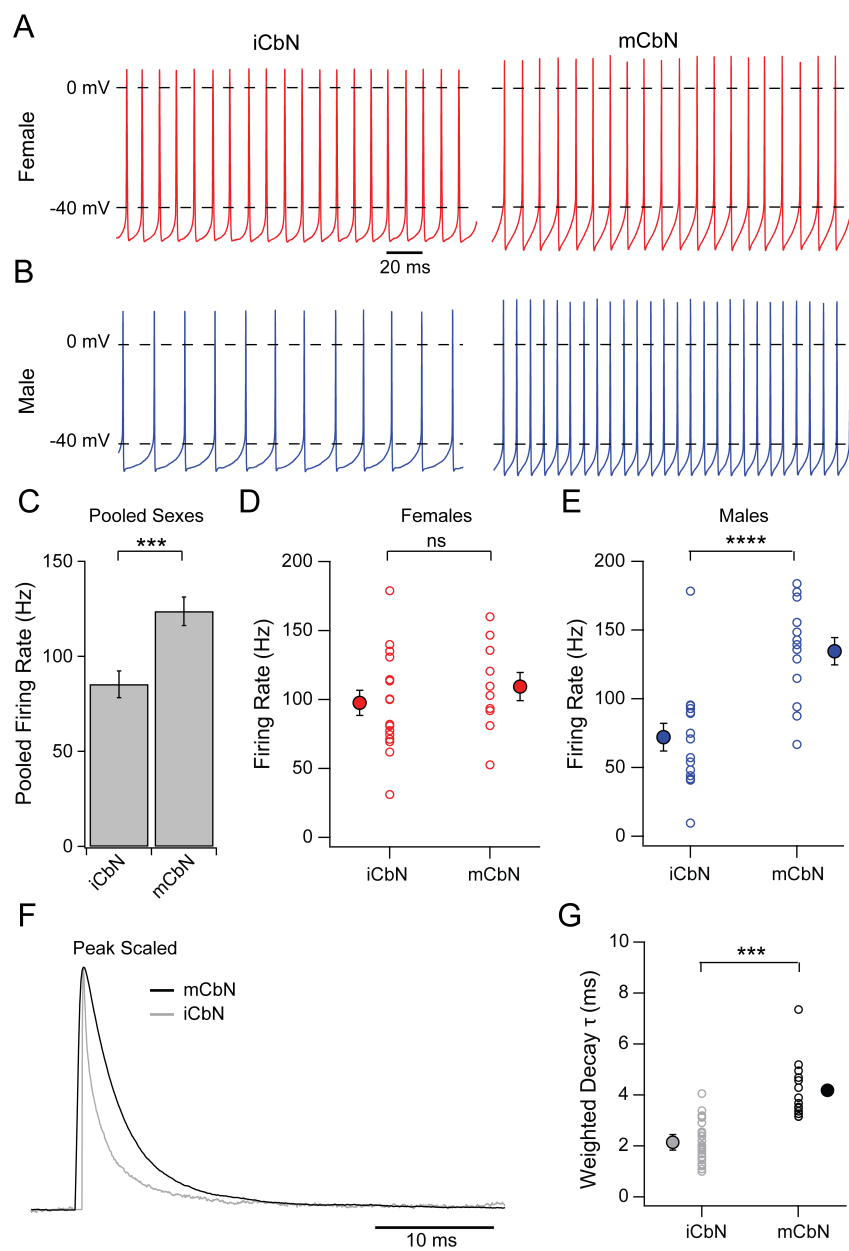

Supplement: supp [file elife-54302-supp-v1.zip]

A

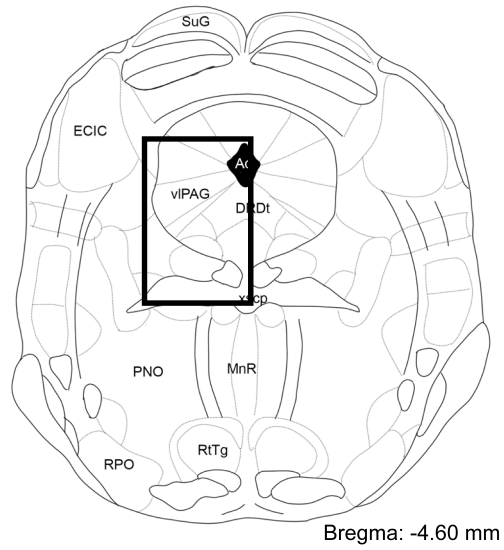

B

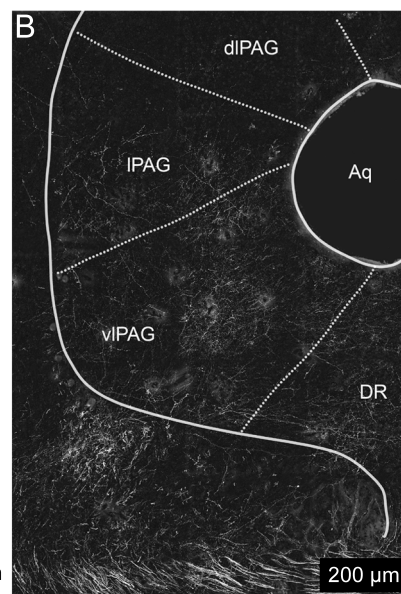

Supplement: supp [file elife-54302-supp-v1.zip]
